# Supplementary material
Source: HighWire-hosted journal article supplement (https://www.life-science-alliance.org/content/4/3/e202000699/F4)
Supplement: inline-supplementary-material-2 [file inline-supplementary-material-2.pdf]

**Figure S3: IP: GFP-Trap: Uncropped Images**

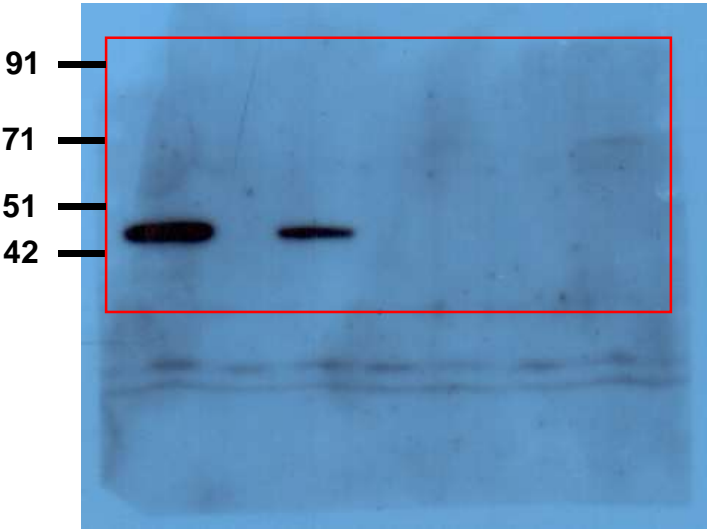

**IB:  $\alpha$ -SYM10**

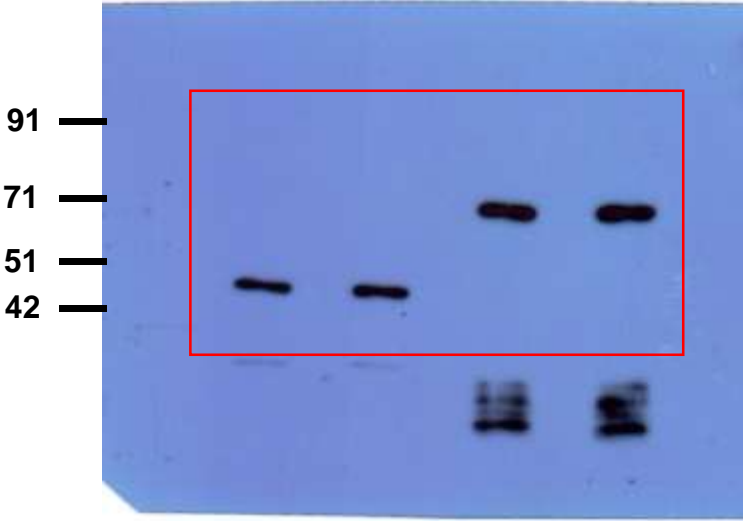

**Input:  $\alpha$ -GFP**
